# Supplementary material
Source: PubMed Central journal article supplement (PMC3347088)
Supplement: supp_194.9.2275_TableS1-S3.pdf [file supp_194.9.2275_TableS1-S3.pdf]

**Supplemental information for:**

**Prevalence and detailed mapping of the gonococcal genetic island in *Neisseria meningitidis***

Katelynn L. Woodhams, Zachary L. Benet, Sarah E. Blonsky, Kathleen T. Hackett, and Joseph P.  
Dillard\*

Department of Medical Microbiology and Immunology  
University of Wisconsin-Madison School of Medicine and Public Health  
1550 Linden Dr, Madison, WI 53705, USA

---

\* Corresponding author:

Mailing address: 1550 Linden Dr., 6301 Microbial Sciences Bldg, Madison WI 53706

Email: [jpdillard@wisc.edu](mailto:jpdillard@wisc.edu)

Phone: (608) 265-2837 Fax: (608) 262-8418

Table S1. Results of GGI screen in *N. meningitidis*

| Strain     | Serogroup | GGI +/- | GGI type | Source        |
|------------|-----------|---------|----------|---------------|
| ATCC 13077 | A         | Neg     | —        | ATCC          |
| M06993     | A         | Neg     | —        | CDC           |
| M07221     | A         | Neg     | —        | CDC           |
| M14761     | A         | Neg     | —        | CDC           |
| M00970     | A         | Neg     | —        | CDC           |
| M0009C     | A         | Neg     | —        | CDC           |
| M020N1     | A         | Neg     | —        | CDC           |
| M016N3     | A         | Neg     | —        | CDC           |
| M13943     | A         | Neg     | —        | CDC           |
| M10050     | A         | Neg     | —        | CDC           |
| M09285     | A         | Neg     | —        | CDC           |
| M07126     | A         | Neg     | —        | CDC           |
| M07339     | A         | Neg     | —        | CDC           |
| M07795     | A         | Neg     | —        | CDC           |
| M07797     | A         | Neg     | —        | CDC           |
| M07799     | A         | Neg     | —        | CDC           |
| M07801     | A         | Neg     | —        | CDC           |
| M03389     | A         | Neg     | —        | CDC           |
| M04656     | A         | Neg     | —        | CDC           |
| M04239     | A         | Neg     | —        | CDC           |
| M01421     | A         | Neg     | —        | CDC           |
| WSLH B-1   | B         | Neg     | —        | WSLH          |
| WSLH B-2   | B         | Neg     | —        | WSLH          |
| WSLH B-3   | B         | Neg     | —        | WSLH          |
| WSLH B-4   | B         | Neg     | —        | WSLH          |
| WSLH B-5   | B         | Neg     | —        | WSLH          |
| WSLH B-6   | B         | Neg     | —        | WSLH          |
| WSLH B-7   | B         | Neg     | —        | WSLH          |
| WSLH B-8   | B         | Neg     | —        | WSLH          |
| WSLH B-9   | B         | Neg     | —        | WSLH          |
| WSLH B-10  | B         | Neg     | —        | WSLH          |
| ATCC 23254 | B         | Neg     | —        | ATCC          |
| ATCC 13090 | B         | Neg     | —        | ATCC          |
| NM00151    | B         | Neg     | —        | L.H. Harrison |
| NM00207    | B         | Neg     | —        | L.H. Harrison |
| NM00254    | B         | Neg     | —        | L.H. Harrison |
| NM00268    | B         | Neg     | —        | L.H. Harrison |
| NM00275    | B         | Neg     | —        | L.H. Harrison |
| NM00290    | B         | Neg     | —        | L.H. Harrison |
| NM00292    | B         | Neg     | —        | L.H. Harrison |

|               |      |     |   |               |
|---------------|------|-----|---|---------------|
| NM00329       | B    | Neg | — | L.H. Harrison |
| NM01036       | B    | Neg | — | L.H. Harrison |
| NM01039       | B    | Neg | — | L.H. Harrison |
| NM02758       | B    | Neg | — | L.H. Harrison |
| WSLH C-1      | C    | Neg | — | WSLH          |
| WSLH C-2      | C    | Neg | — | WSLH          |
| WSLH C-3      | C    | Pos | 5 | WSLH          |
| WSLH C-4      | C    | Pos | 5 | WSLH          |
| WSLH C-5      | C    | Pos | 5 | WSLH          |
| WSLH C-6      | C    | Pos | 5 | WSLH          |
| WSLH C-7      | C    | Pos | 5 | WSLH          |
| WSLH C-8      | C    | Neg | — | WSLH          |
| WSLH C-9      | C    | Neg | — | WSLH          |
| WSLH C-10     | C    | Neg | — | WSLH          |
| NM00002       | C    | Neg | — | L.H. Harrison |
| NM00041       | C    | Neg | — | L.H. Harrison |
| NM00141       | C    | Neg | — | L.H. Harrison |
| NM00178       | C    | Neg | — | L.H. Harrison |
| NM00199       | C    | Neg | — | L.H. Harrison |
| NM00200       | C    | Neg | — | L.H. Harrison |
| NM00272       | C    | Neg | — | L.H. Harrison |
| NM00273       | C    | Neg | — | L.H. Harrison |
| NM00306       | C    | Neg | — | L.H. Harrison |
| NM00344       | C    | Neg | — | L.H. Harrison |
| NM01028       | C    | Neg | — | L.H. Harrison |
| ATCC 13102    | C    | Pos | 2 | ATCC          |
| ATCC 13113    | D    | Neg | — | ATCC          |
| 98/250521     | H    | Pos | 3 | PHLS          |
| 97/252675     | H    | Pos | 5 | PHLS          |
| WSLH W135-1   | W135 | Pos | 3 | WSLH          |
| WSLH W135-2   | W135 | Neg | — | WSLH          |
| WSLH W135-3   | W135 | Pos | 3 | WSLH          |
| WSLH W135-4   | W135 | Pos | 3 | WSLH          |
| 43744         | W135 | Neg | — | L.H. Harrison |
| 35559         | W135 | Neg | — | L.H. Harrison |
| NM00076       | W135 | Neg | — | L.H. Harrison |
| NM00079       | W135 | Neg | — | L.H. Harrison |
| NM00110       | W135 | Neg | — | L.H. Harrison |
| NM00112       | W135 | Neg | — | L.H. Harrison |
| NM00134       | W135 | Neg | — | L.H. Harrison |
| NM00174       | W135 | Neg | — | L.H. Harrison |
| NM02978       | W135 | Pos | 3 | L.H. Harrison |
| A22           | W135 | Pos | 3 | D. A. Caugant |
| $\alpha$ 275* | W135 | Pos | 4 | —             |

|           |   |     |   |               |
|-----------|---|-----|---|---------------|
| WSLH X-2  | X | Neg | — | WSLH          |
| WSLH X-3  | X | Neg | — | WSLH          |
| NM00255   | X | Neg | — | L.H. Harrison |
| NM00358   | X | Neg | — | L.H. Harrison |
| M08210    | X | Neg | — | CDC           |
| M07186    | X | Neg | — | CDC           |
| M09664    | X | Pos | 5 | CDC           |
| M04222    | X | Neg | — | CDC           |
| M04370    | X | Neg | — | CDC           |
| M00328    | X | Neg | — | CDC           |
| M15113    | X | Pos | 1 | CDC           |
| WSLH Y-1  | Y | Neg | — | WSLH          |
| WSLH Y-2  | Y | Neg | — | WSLH          |
| WSLH Y-3  | Y | Neg | — | WSLH          |
| WSLH Y-4  | Y | Neg | — | WSLH          |
| WSLH Y-5  | Y | Neg | — | WSLH          |
| WSLH Y-6  | Y | Neg | — | WSLH          |
| WSLH Y-7  | Y | Neg | — | WSLH          |
| WSLH Y-8  | Y | Neg | — | WSLH          |
| WSLH Y-9  | Y | Neg | — | WSLH          |
| WSLH Y-10 | Y | Neg | — | WSLH          |
| NM00080   | Y | Neg | — | L.H. Harrison |
| NM00083   | Y | Neg | — | L.H. Harrison |
| NM00127   | Y | Neg | — | L.H. Harrison |
| NM00130   | Y | Neg | — | L.H. Harrison |
| NM00176   | Y | Neg | — | L.H. Harrison |
| NM00190   | Y | Neg | — | L.H. Harrison |
| NM00191   | Y | Neg | — | L.H. Harrison |
| NM00211   | Y | Neg | — | L.H. Harrison |
| NM00220   | Y | Neg | — | L.H. Harrison |
| NM00233   | Y | Neg | — | L.H. Harrison |
| NM00286   | Y | Neg | — | L.H. Harrison |
| NM00293   | Y | Neg | — | L.H. Harrison |
| NM02767   | Y | Neg | — | L.H. Harrison |
| WSLH Z-1  | Z | Neg | — | WSLH          |
| WSLH Z-2  | Z | Pos | 5 | WSLH          |
| WSLH Z-3  | Z | Neg | — | WSLH          |
| NM00140   | Z | Pos | 5 | L.H. Harrison |
| NM00183   | Z | Pos | 5 | L.H. Harrison |
| 00/240868 | Z | Pos | 5 | PHLS          |
| 01/241422 | Z | Pos | 5 | PHLS          |
| 01/241471 | Z | Pos | 1 | PHLS          |

\* Only the draft genome sequence of  $\alpha$ 275 was used

Table S2. Primers used for cloning and Southern blotting

| Name            | Sequence (5'→3')                                    | Target             | Plasmid |
|-----------------|-----------------------------------------------------|--------------------|---------|
| SacI-195F       | GCC CGA GCT CAT TCT GAC GCT CCT GCA TCT             | <i>yea</i>         | pSB2    |
| SacII-64R       | GAA TCC GCG GCC GAA CGT GAC CAA CTT CAG             | <i>yecA</i>        |         |
| BamHI-kanF      | CAG GAT CCA AAG CCA GTC CGC AGA AAC G               | KanR and promoter  | pKH99   |
| BamHI-kanR      | CTG GAT CCT GGG CGA AGA ACT CCA GCA T               | KanR               |         |
| RpsL F          | CAG CTC GAG TGA TTG TGA GGG ATG TCG G               | <i>rpsL</i>        | pNMD42  |
| RpsL R          | TTA GGT ACC GGC AGT ACG TCG CGC TTG G               | <i>rpsL</i>        |         |
| SpeI-77F        | CAT ACT AGT TAA CAG CAG ACG CTC CAT TC              | upstream of GGI    | pNMD37  |
| dif-Sac 4R      | ACT GAG CTC AGA TTG CAT AAT ATA CAT TAT GCG AAC T   | <i>difB</i>        |         |
| PspOMI-183F     | GAC TTC GGG CCC TTC AGC CTA TTG CGA GCT GT          | <i>yfd</i>         | pKL22   |
| KpnI-144R       | GCG GTA CCA TGT GCG TCA GTT TGC TCA G               | <i>yfeA</i>        |         |
| pMOB F          | GTA AAA CGA CGG CCA GTG AGC GCG                     | polylinker of pIDN | pKL19   |
| SacI-pKL18 R    | GTT CGA GCT CCG GAA TCG CCA CGA ACA AAC CC          | <i>exbB</i>        |         |
| XmaI-pGCU R     | CAT GCC CGG GAA CGT TGT TGC CAT TGC TGC             | DUS sequence       | pKL18   |
| XmaI-pKL16 F    | GAA CAA CCC GGG ATT TAG GCG GTT GTC GCG GCA GTT TGC | pKL16              | pKL17   |
| XmaI-pKL16 R    | CAG GCA CCC GGG ATC CAT AAT TCG GGC ATA ATA ATA GC  | pKL16 for tonB     |         |
| BamHI-tonB F    | GAA GCG GAT CCT GAG CCA GCG GCA TCT GAT ACG         | <i>NGO1380</i>     | pKL16   |
| PstI-tonB R     | GAA GTC CTG CAG CGG AAT CGC CAC GAA CAA ACC C       | <i>exbB</i>        |         |
| pKL13 F2        | CTG GTA GCA GCA ATT TGG ATG                         | pKL13              | pKL15   |
| HindIII-pGCU R2 | CCG CAT AAG CCA AGC TTA ACG TTG TTG CCA TTG CTG C   | DUS sequence       |         |
| SacI-83R        | GCG AGC TCA TCT CTA GGC TTC CAG TAG A               | <i>yaa</i>         | pKL13   |
| 53F             | TAG ATG CGA TCA CCC TTA CG                          | <i>tral</i>        |         |
| 235R            | TTG TTC TGG ATA CAG CGT GCT AGC GG                  | <i>tral</i>        |         |
| 247F            | ATG ACA CTA AGA AGC TTG GG                          | <i>yaf</i>         |         |

|      |                            |
|------|----------------------------|
| 254R | CAT GCG GCG TTA TAA GCA CC |
| 193F | CCG GTC AGT TGA AGT AAT CG |
| 218R | AAA GTT TGG CGA GTC TCA GC |
| 197F | TTC AGC CAG ATA CTG CTC AC |
| 72R  | TAG CGG TTT CTA ACC CTG AC |

*oriT*

*ydhA*

*ydhB*

*yea*

*yeb*

Table S3. Primers used in PCR walk of meningococcal GGIs

| Primer pair      | Sequence (5'-->3')                | Target                   |
|------------------|-----------------------------------|--------------------------|
| 77F-76R          | TAA CAG CAG ACG CTC CAT TC        | <i>difB</i> flanking DNA |
|                  | ATG GCG TTT CGT CAA CGT TT        | <i>traD</i>              |
| 135F-118R        | CCG GCC TTA TTC AAT AAC GG        | <i>traD</i>              |
|                  | AAC CGG TGA CAG CAG AAC AA        | <i>traI</i>              |
| 255F-254R        | TCA GAA ACT ATG GCT TCG AG        | <i>traI</i>              |
|                  | CAT GCG GCG TTA TAA GCA CC        | <i>ltgX</i>              |
| 51F-254R         | TAT CAA TTG TGC CGT AAC CC        | <i>traI</i>              |
|                  | CAT GCG GCG TTA TAA GCA CC        | <i>ltgX</i>              |
| 53F-48R          | ACG GCG GTA AGG TTG CGT CT        | <i>traI</i>              |
|                  | CCA AGC CAA TAA ATC GTC TG        | <i>traL</i>              |
| 111F-46R         | CCG CTG ACA AGC ATT AGT G         | <i>traI</i>              |
|                  | CTC AAG ATC ACC CTC CAT AA        | <i>traK</i>              |
| 45F-124R         | CCG CGA GCT ACT TAT TTC TT        | <i>traE</i>              |
|                  | TGC GGT ATA GTC TGT CAT GC        | <i>dsbC</i>              |
| 55F-60R          | ACG GCG GTA AGG TTG CGT CT        | <i>traB</i>              |
|                  | CCA AGC CAA TAA ATC GTC TG        | <i>traC</i>              |
| 59F-58R          | GAT TAG CGG TAT GGG TAA GG        | <i>traB</i>              |
|                  | TCA ACC TCT TTG TCG ATA GC        | <i>traC</i>              |
| 119F-132R        | GAC CAT TTG AGC GGA CTA TC        | <i>traC</i>              |
|                  | CAT ACG CCT AAT GCC AAT GC        | <i>ybe</i>               |
| 89F-94R          | GCC GTG TCC GTA AGT ACA AA        | <i>ybe</i>               |
|                  | AAT TTA GCG GCC TGC ACT TC        | <i>traU</i>              |
| 35F-34R          | GCA CAA AAA TAC CGC ACT GCC TCA C | <i>trbC</i>              |
|                  | AAC GGT GCA GCA ATA ATC GGC AG    | <i>traN</i>              |
| 221F-28R         | AAG GTG GTA TGC GAG AAA TCA GG    | <i>ybi</i>               |
|                  | TCT AAC TGT TCC AAT TCC TGT GCG   | <i>traN</i>              |
| 225F-TRAH4R      | TCA GAT TGG TGC GTT GGG TTT CTC   | <i>traN</i>              |
|                  | CTG TGT ATT TGT CCT TAT CCC       | <i>traH</i>              |
| 27F-18R          | CGG TTG ACA ACG CGG ATA TTT CAG G | <i>traH</i> promoter     |
|                  | CTC AGC AGC AGA ACG AAT CAA GG    | <i>traG</i>              |
| traG1F-PID2R     | GCA ACT GAC TCA AGA CTG GGC       | <i>traG</i>              |
|                  | CTT TGG GCG ATA GTT ACG AG        | <i>eppA</i>              |
| PID3F-1105-8R    | AAT CCG GTG CGA CTG TTA GT        | <i>traG</i>              |
|                  | GGA TTA CAA GTG ACA GCA TCC AAG   | <i>yda</i>               |
| CSHR-1105-6R     | GGC TAA GAT GTA GAA AAA GCC CAG   | <i>cspA</i>              |
|                  | CCG AAA AAG CAT GGG ATT CTG       | <i>ydbA</i>              |
| 1105-7F-1105-10R | GCC AAG TCC CGC CAA TTT ACT GTC   | <i>yda</i>               |

|              |                                 |                                    |
|--------------|---------------------------------|------------------------------------|
|              | TTG ACC AGG AGG AAG GCG ACC     | <i>ydbA</i>                        |
| 248F-150R    | ACT GAC TGG CAG CGA TGA CA      | <i>ydcB-ydcA</i> intergenic region |
|              | ATT GGT GCT CCT GTC GTT TG      | <i>ydeA</i>                        |
| 63F-196R     | ATA AGG AAA CCC GCA GGT TG      | <i>ydeA-ydd</i> intergenic region  |
|              | CTT CGG GAT GTA CGG CAT TT      | <i>ydg-ydf</i> intergenic region   |
| 257F-256R    | AAA TGC CGT ACA TCC CTA AG      | <i>ydg-ydf</i> intergenic region   |
|              | TTT CTT CGC ACG TAC CTT CG      | <i>ydhA</i>                        |
| 105F-190R    | CGA AGG TAC GTG CGA AGA AA      | <i>ydhA</i>                        |
|              | ACA GGG CAT CGG TAT ATC TC      | <i>yea-ydi</i> intergenic region   |
| 81F-88R      | TCC TTG GGT TCC TGT TTG AC      | <i>ydi-ydhB</i> intergenic region  |
|              | GGC GCA TTC AGT AGC TCA AA      | <i>yea</i>                         |
| 147F-72R     | CCA GCA TGT CAG CTT CTT TC      | <i>yea</i>                         |
|              | TAG CGG TTT CTA ACC CTG AC      | <i>yeb-yea</i> intergenic region   |
| 149F-64R     | GAA CAG GTC TTC CGC ATA AC      | <i>yea</i>                         |
|              | CCG AAC GTG ACC AAC TTC AG      | <i>yecA</i>                        |
| 155F-192R    | CAG TCC AAA CCC GCC ATA TT      | <i>yeb</i>                         |
|              | GGA GGC ATA TTC CCA AAC TT      | <i>yedA-yecB</i> intergenic region |
| 155F-220R    | CAG TCC AAA CCC GCC ATA TT      | <i>yeb</i>                         |
|              | GCG CCA CCT CTT ACT TAG AT      | <i>yedA-yecB</i> intergenic region |
| 219F-202R    | TCA GGC GCG GAC AGC TTA AA      | <i>yedA</i>                        |
|              | TTA AAC CGG CCA CGT GAA GT      | <i>yeg-yee</i> intergenic region   |
| 203F-142R    | ACC TCC GAC GAT ACG AAG AT      | <i>yeg-yee</i> intergenic region   |
|              | CCG ATA ACG ACA GCC AAA TG      | <i>topB</i>                        |
| 215F-160R    | TTC GGG AAA CCT ACT ACA CC      | <i>topB</i>                        |
|              | TGT TAC CTG GGC ATT TGG TC      | <i>topB</i>                        |
| 99F-166R     | GTA CCT GCA TCT GCC AAA CT      | <i>topB</i>                        |
|              | GTA TAA TGG CGG TCG GAT GA      | <i>yfb</i>                         |
| 117F-168R    | GGC AGA ATC TCT TGC TCA AC      | <i>yfb</i>                         |
|              | ACA GCT CGC AAT AGG CTG AA      | <i>yfd</i>                         |
| 179F-144R    | CAT TGC AGC AGT CTT CAG AG      | <i>yfd</i>                         |
|              | ATG TGC GTC AGT TTG CTC AG      | <i>yfeB</i>                        |
| 183F-120R    | TTC AGC CTA TTG CGA GCT GT      | <i>yfd</i>                         |
|              | AAA CGG GAG CTA AGA GTG AG      | <i>parB</i>                        |
| 177F-106R    | GCT TTG CGG TAA TAC CTG CT      | <i>yfeA</i>                        |
|              | CGC AGC ATT TGC TGC TAC AT      | <i>parA</i>                        |
| 259F-260R    | CTC ACT CTT AGC TCC CGT TT      | <i>parB</i>                        |
|              | TAC GAG CCA TCA TCT ACG CAC AAG | <i>parA</i>                        |
| 165F-hlhggiR | TGC GTA GAT GAT GGC TCG TA      | <i>parA</i>                        |



|              |                                 |                                   |
|--------------|---------------------------------|-----------------------------------|
|              | CAG GCA AAC AGC TAT TTG AG      | <i>ung</i>                        |
| 83F-82R      | TCT ACT GGA AGC CTA GAG AT      | downstream of <i>yaa</i>          |
|              | ATC GGT GAC GAA TTC ATT CC      | <i>traD</i>                       |
| 137F-118R    | CCA GGG TGG TGT TTA TCT AA      | <i>traD</i>                       |
|              | AAC CGG TGA CAG CAG AAC AA      | <i>traI</i>                       |
| 45F-46R      | CCG CGA GCT ACT TAT TTC TT      | <i>traE</i>                       |
|              | CTC AAG ATC ACC CTC CAT AA      | <i>traK</i>                       |
| 113F-1105-6R | CTG CCT CAA GAC GCA ACT TA      | <i>yag</i>                        |
|              | CCG AAA AAG CAT GGG ATT CTG     | <i>ydbA</i>                       |
| 155F-106R    | CAG TCC AAA CCC GCC ATA TT      | <i>yeb</i>                        |
|              | CGC AGC ATT TGC TGC TAC AT      | <i>parA</i>                       |
| 63F-148R     | ATA AGG AAA CCC GCA GGT TG      | <i>ydeA-ydd</i> intergenic region |
|              | ACG TCT GAC CTT GCC AAA CAG AGA | <i>ydeB</i>                       |

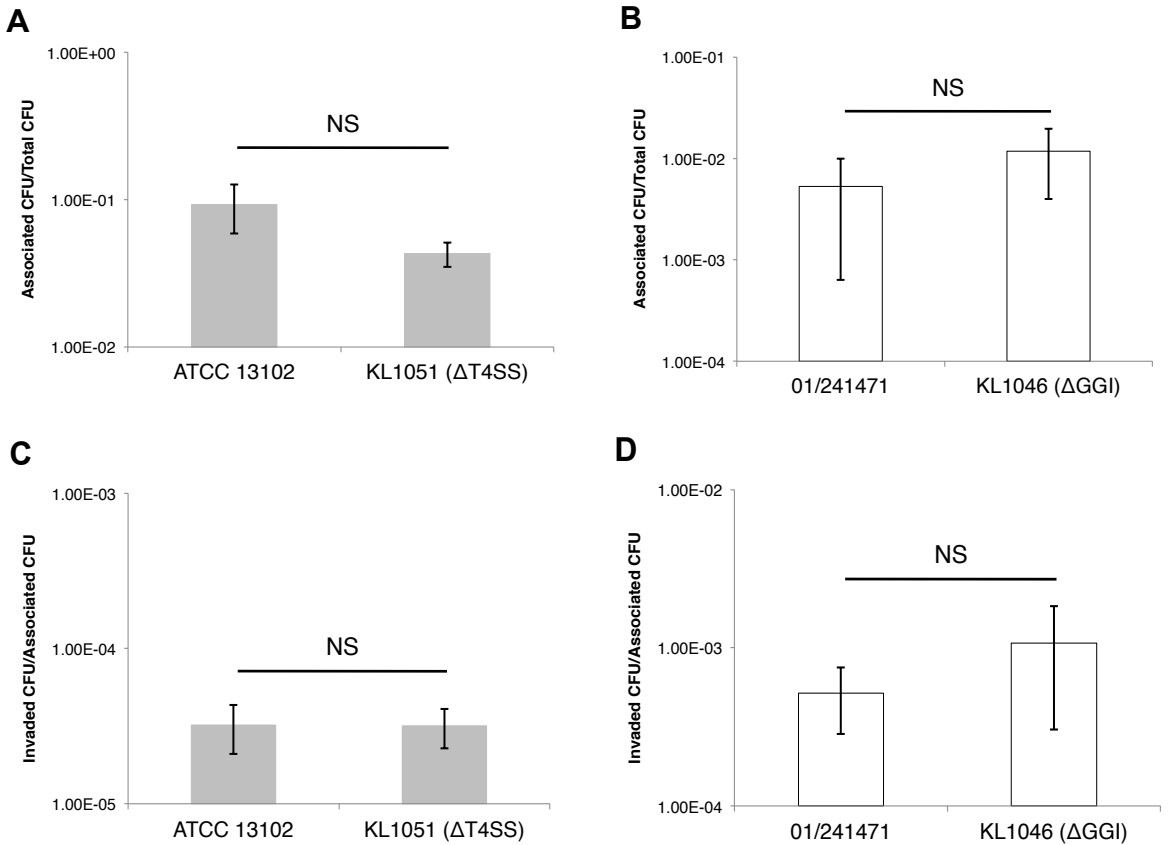

**Figure S1.** *N. meningitidis* do not exhibit T4SS-dependent differences in association to and invasion of ME180 epithelial cells. ME180 cells were infected with meningococci for 3.5 hrs at MOI=100. Supernatants and saponin lysates were collected and plated onto GCB agar to determine total CFU counts. Cells were extensively washed, lysed, and plated onto GCB agar to enumerate associated CFU. Additional wells were treated with 25  $\mu$ g/ml Gm for one hour, washed, lysed, and plated to determine the number of intracellular bacteria. (A) and (C) The association index is a ratio of associated CFU:total CFU. (B) and (D) The invasion index is a ratio of intracellular CFU:associated CFU. Columns represent the geometric mean of three independent experiments, each performed in triplicate. Error bars represent the standard error of the mean.  $p > 0.05$  by ANOVA and Tukey-Kramer method. NS-no significance.
